# Supplementary material for: Temporal trends in age at menarche and age at menopause: a population study of 312 656 women in Norway
Source: PubMed Central journal article supplement — Hum Reprod. 2020 Feb 28;35(2):464–71. doi: 10.1093/humrep/dez288 (PMC7048709; doi:10.1093/humrep/dez288), 2020-02-28
Supplement: suppl_tab1_dez288.pdf [file suppl_tab1_dez288.pdf]

**Supplementary Table S1** Temporal trends in age at menarche, age at menopause and number of years between menarche and menopause among 312 656 women in the BreastScreen Norway, born during the years 1936–1964.<sup>a</sup>

|                                                       | Less than high school<br>N = 78 707 |             | High school<br>N = 129 694 |             | College/university<br>N = 100 595 |             |
|-------------------------------------------------------|-------------------------------------|-------------|----------------------------|-------------|-----------------------------------|-------------|
|                                                       | Mean                                | 95% CI      | Mean                       | 95% CI      | Mean                              | 95% CI      |
| <b>Age at menarche</b>                                |                                     |             |                            |             |                                   |             |
| Birth cohort                                          |                                     |             |                            |             |                                   |             |
| 1936–1939                                             | 13.50                               | 13.47–13.52 | 13.39                      | 13.35–13.43 | 13.30                             | 13.25–13.35 |
| 1940–1944                                             | 13.36                               | 13.34–13.38 | 13.34                      | 13.31–13.36 | 13.23                             | 13.21–13.26 |
| 1945–1949                                             | 13.35                               | 13.33–13.37 | 13.31                      | 13.29–13.32 | 13.22                             | 13.20–13.24 |
| 1950–1954                                             | 13.28                               | 13.26–13.30 | 13.23                      | 13.22–13.26 | 13.14                             | 13.13–13.16 |
| 1955–1959                                             | 13.21                               | 13.19–13.23 | 13.19                      | 13.18–13.21 | 13.15                             | 13.13–13.16 |
| 1960–1964                                             | 13.20                               | 13.16–13.24 | 13.24                      | 13.23–13.26 | 13.22                             | 13.20–13.24 |
| <b>Age at menopause</b>                               |                                     |             |                            |             |                                   |             |
| Birth cohort                                          |                                     |             |                            |             |                                   |             |
| 1936–1939                                             | 49.89                               | 49.79–49.97 | 50.84                      | 50.71–50.97 | 50.54                             | 50.43–50.65 |
| 1940–1944                                             | 50.43                               | 50.28–50.41 | 51.38                      | 51.30–51.45 | 50.91                             | 50.84–50.98 |
| 1945–1949                                             | 50.15                               | 50.09–50.22 | 51.25                      | 51.19–51.31 | 50.75                             | 50.69–50.80 |
| 1950–1954                                             | 50.35                               | 50.28–50.43 | 51.39                      | 51.33–51.44 | 50.87                             | 50.81–50.92 |
| 1955–1959                                             | 51.02                               | 50.89–51.15 | 52.27                      | 52.18–52.36 | 51.62                             | 51.55–51.70 |
| 1960–1964                                             | 51.36                               | 51.11–51.61 | 52.00                      | 52.85–53.12 | 52.39                             | 52.27–52.51 |
| <b>Number of years between menarche and menopause</b> |                                     |             |                            |             |                                   |             |
| Birth cohort                                          |                                     |             |                            |             |                                   |             |
| 1936–1939                                             | 36.36                               | 36.27–36.45 | 37.08                      | 36.96–37.19 | 37.48                             | 37.34–37.62 |
| 1940–1944                                             | 36.96                               | 36.89–37.03 | 37.52                      | 37.45–37.60 | 38.10                             | 38.02–38.19 |
| 1945–1949                                             | 36.78                               | 36.72–36.85 | 37.38                      | 37.32–37.43 | 37.96                             | 37.90–38.02 |
| 1950–1954                                             | 37.15                               | 37.07–37.23 | 37.71                      | 37.65–37.76 | 38.33                             | 38.26–38.39 |
| 1955–1959                                             | 38.23                               | 38.08–38.38 | 38.90                      | 38.81–38.99 | 39.63                             | 39.53–39.73 |
| 1960–1964                                             | 38.72                               | 38.08–38.38 | 39.80                      | 39.65–39.95 | 40.45                             | 40.30–40.60 |

The mean age at menarche, mean age at menopause and mean number of years between menarche and menopause are estimated with 95% CI by applying flexible parametric models.

<sup>a</sup>N = 308 996 women due to missing information about educational level (1.2% missing).
