# Supplementary material for: Temporal trends in age at menarche and age at menopause: a population study of 312 656 women in Norway
Source: PubMed Central journal article supplement — Hum Reprod. 2020 Feb 28;35(2):464–71. doi: 10.1093/humrep/dez288 (PMC7048709; doi:10.1093/humrep/dez288), 2020-02-28
Supplement: suppl_tab2_dez288.pdf [file suppl_tab2_dez288.pdf]

**Supplementary Table SII** Temporal trends in age at menopause among 301 028 women born during the years 1936–1964.

|              | Age at menopause, years |             |           |           |
|--------------|-------------------------|-------------|-----------|-----------|
|              | Mean                    | 95% CI      | HR        | 95% CI    |
| Birth cohort |                         |             |           |           |
| 1936–1939    | 50.41                   | 50.36–50.46 | Reference |           |
| 1940–1944    | 50.84                   | 50.81–50.88 | 0.88      | 0.86–0.89 |
| 1945–1949    | 50.88                   | 50.85–50.91 | 0.87      | 0.85–0.88 |
| 1950–1954    | 51.03                   | 51.00–51.06 | 0.83      | 0.81–0.84 |
| 1955–1959    | 51.83                   | 51.79–51.88 | 0.66      | 0.65–0.67 |
| 1960–1964    | 52.58                   | 52.51–52.64 | 0.54      | 0.53–0.55 |

Women with menopause <40 years and > 60 years are excluded ( $n = 11\ 628$ ). The associations of birth cohort with age at menopause are estimated as crude HRs with 95% CI by applying flexible parametric models.

HR = hazard ratio.
