# Supplementary figures and images for: Temporal trends in age at menarche and age at menopause: a population study of 312 656 women in Norway
Source: PubMed Central journal article supplement — Hum Reprod. 2020 Feb 28;35(2):464–71. doi: 10.1093/humrep/dez288 (PMC7048709; doi:10.1093/humrep/dez288), 2020-02-28

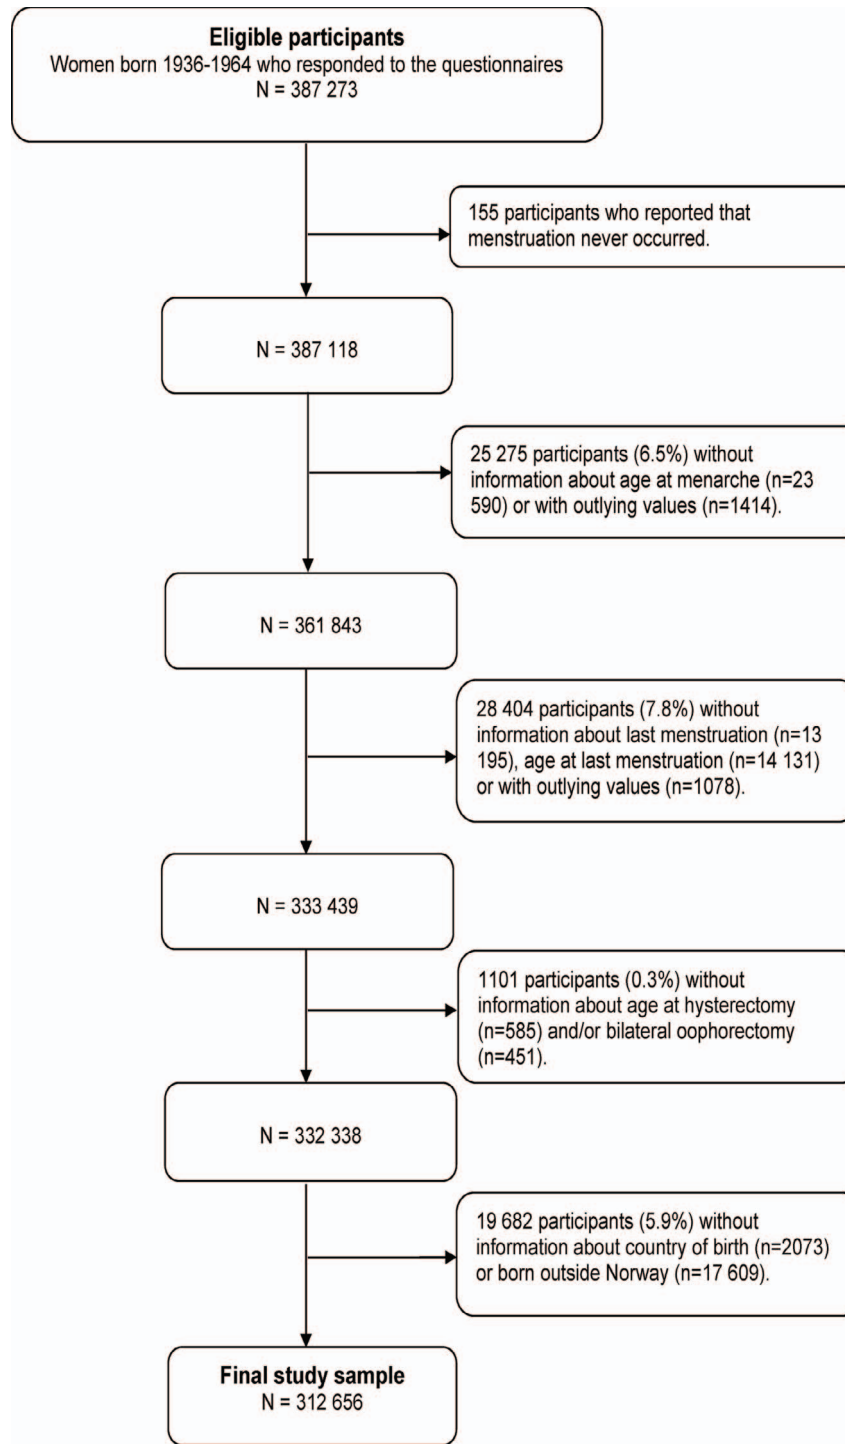

Supplementary Figure S1 Flow chart of the study sample; 312 656 women in the BreastScreen Norway, 2006–2014.

Supplement: suppl_fig1_dez288.pdf [file suppl_fig1_dez288.pdf]
